# Supplementary material
Source: PubMed Central journal article supplement (PMC2805410)
Supplement: NIHMS165191-supplement-1_si_001.pdf [file NIHMS165191-supplement-1_si_001.pdf]

## Supporting Information (SI)

“Quantitative correlation between the protein primary sequences and secondary structures in spider silks” by J.E. Jenkins *et al.*

$^1\text{H} \rightarrow ^{13}\text{C}$  CP and  $^{13}\text{C}$  DD-MAS spectra with a rapid recycle delay were collected of Ma and Mi silk in their dry and wetted state on a Varian VNMRs 400 MHz wide-bore spectrometer equipped with a 3.2 mm triple resonance probe operating in triple resonance mode ( $^1\text{H}/^{13}\text{C}/^{15}\text{N}$ ).  $^1\text{H} \rightarrow ^{13}\text{C}$  CP were collected at 5 kHz MAS matched on the Hartmann-Hahn condition with a  $3.4 \mu\text{s}$   $^1\text{H}$  pulse, a CP rf field strength of 75 kHz with a 1 ms contact time, and  $\sim 100$  kHz TPPM  $^1\text{H}$  decoupling.  $^{13}\text{C}$  DD-MAS were collected at 20 kHz MAS with a  $3 \mu\text{s}$   $^{13}\text{C}$  pulse, a recycle delay of 1 s, and  $\sim 100$  kHz TPPM  $^1\text{H}$  decoupling.

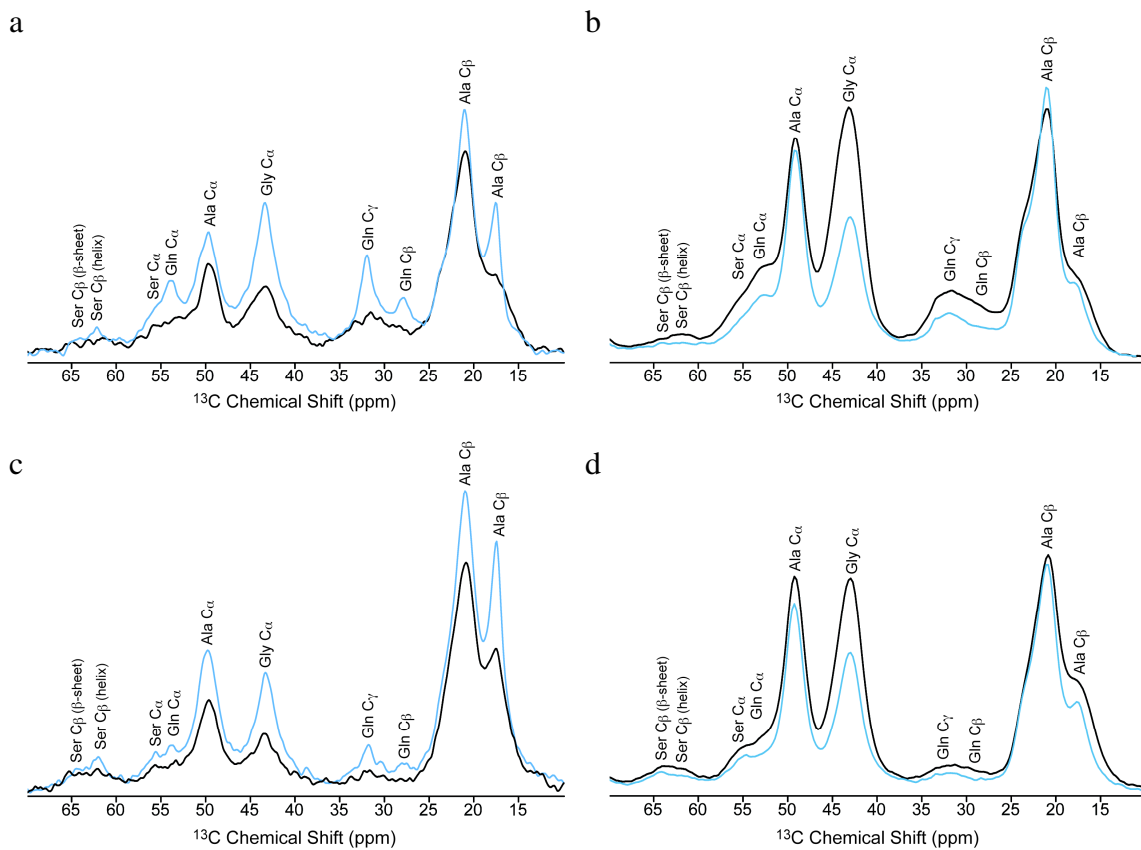

**Figure S1 |  $^{13}\text{C}$  DD-MAS of *N. clavipes* (a) Ma and (c) Mi silk in the water wetted state (blue) and dry (black).  $^{13}\text{C}$  CP-MAS of (b) Ma and (d) Mi silk in the dry state (black) and wet state (blue). The Ser  $\text{C}_\beta$  in a helical conformation is enhanced in the  $^{13}\text{C}$  DD-MAS when silk is wetted due to an increase in mobility however, this increase in mobility cause CP to be inefficient and the helical Ser  $\text{C}_\beta$  to decrease in intensity in the  $^{13}\text{C}$  CP-MAS.  $^{13}\text{C}$  DD-MAS and  $^{13}\text{C}$  CP-MAS were collected of Ma and Mi in the dry and wetted state to determine that the upfield (lower ppm) side of the broad Ser  $\text{C}_\beta$  peak is in a mobile helical conformation and the downfield (higher ppm) shoulder is from the Ser  $\text{C}_\beta$  that adopts a rigid  $\beta$ -sheet secondary structure.**
